# Supplementary material for: Transcriptomic analysis of the regulation of stalk development in flowering Chinese cabbage (Brassica campestris) by RNA sequencing
Source: PubMed Central journal article supplement (PMC5686075; doi:10.1038/s41598-017-15699-6), 2017-11-14
Supplement: 41598_2017_15699_MOESM1_ESM.pdf [file 41598_2017_15699_MOESM1_ESM.pdf]

## Supplementary Information

**Transcriptomic analysis of the regulation of stalk development in flowering Chinese cabbage (*Brassica campestris*) by RNA sequencing**

Xinmin Huang, Yuling Lei, Hongling Guan, Yanwei Hao, Houcheng Liu, Guangwen Sun, Riyuan Chen\*, and Shiwei Song\*

Guangdong Provincial Engineering Technology Research Center for Protected Horticulture, College of Horticulture, South China Agricultural University, Guangzhou 510642, Guangdong, China

\* The corresponding authors, R.C. (email: rychen@scau.edu.cn) and S.S. (email: swsong@scau.edu.cn) contributed equally to this work.

## Supplementary Figure

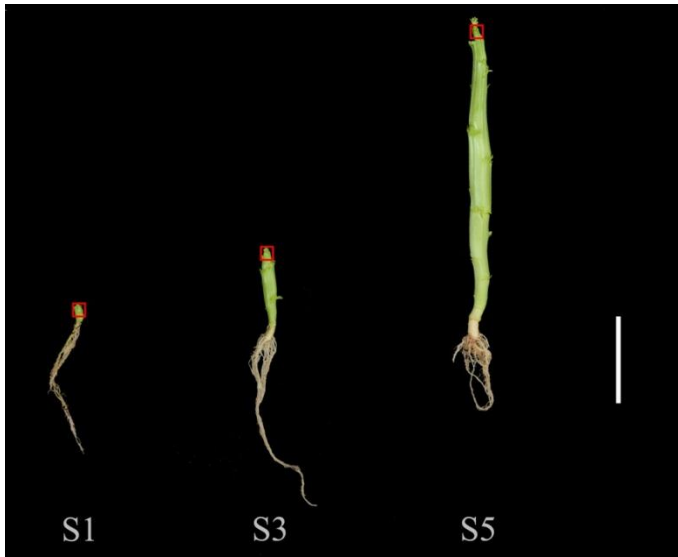

**Figure S1.** Changes in stalks during development in three stages, namely the seedling stage (S1), bolting stage (S3), and flowering stage (S5). The red box shows the sampling section used for RNA-seq and anatomical analysis. Bar = 5 cm.

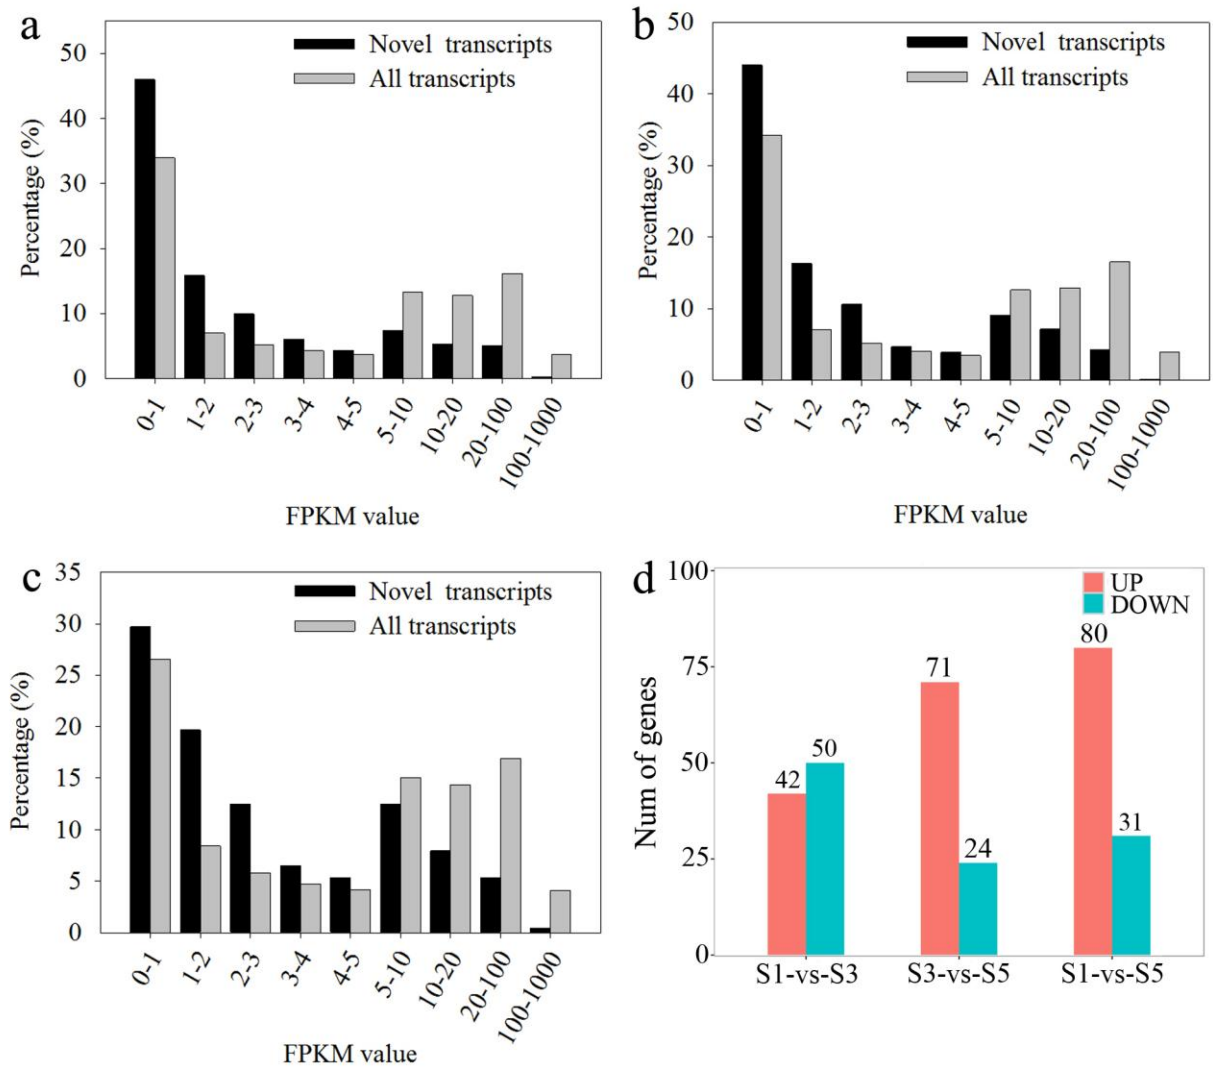

**Figure S2.** Expression pattern of novel transcripts. (a) Stage S1. (b) Stage S3. (c) Stage S5. (d) Pairwise comparisons of novel transcript expression levels. The numbers of up- and down-regulated genes in each pair of stages is presented.

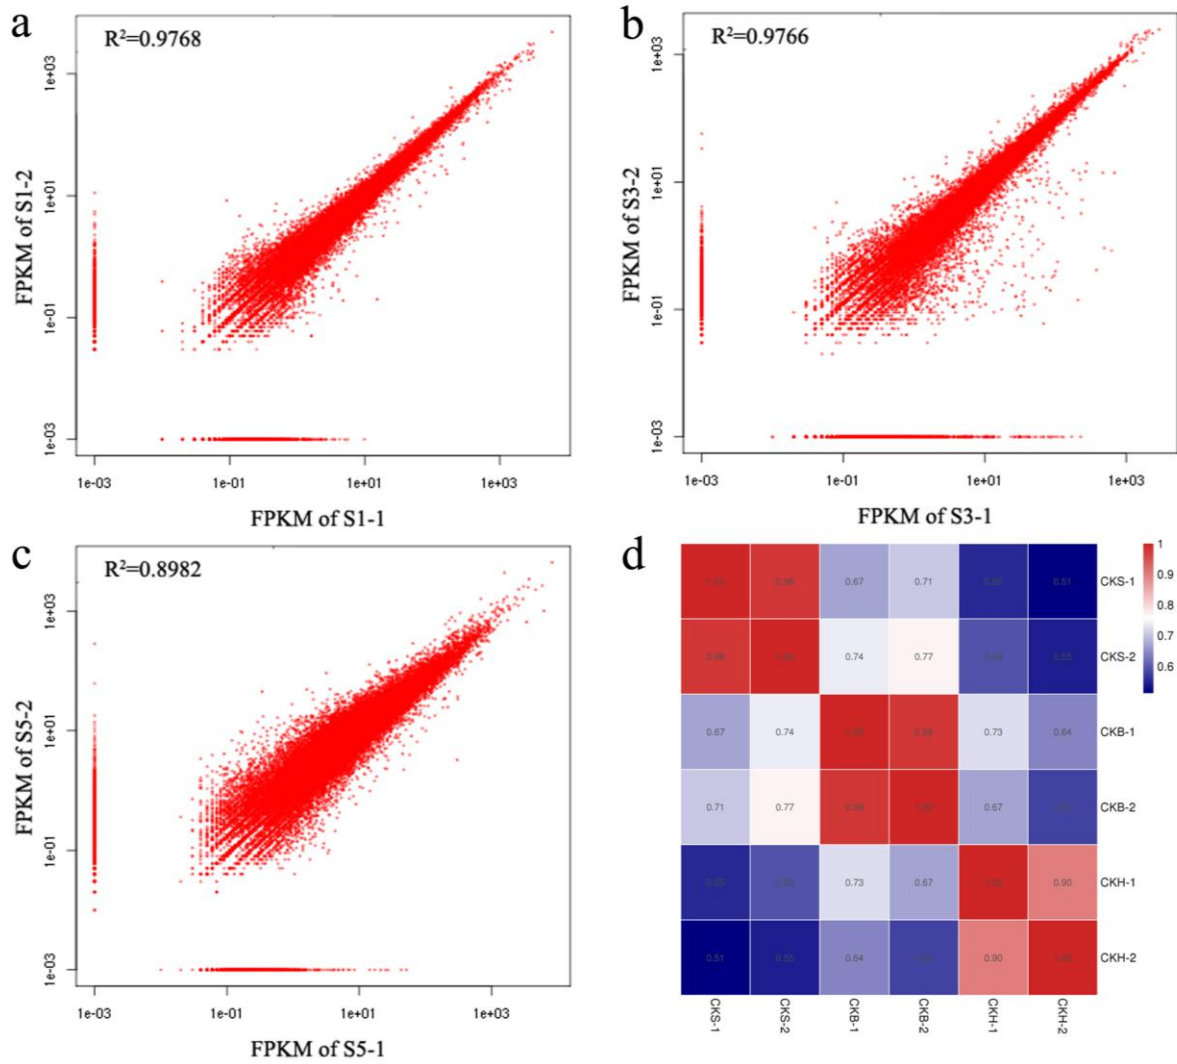

**Figure S3.** Correlation between gene-expression levels in two biological replicates for each stage. Pearson's correlation coefficients between (a) S1-1 vs. S1-2, (b) S3-1 vs. S3-2, (c) S5-1 vs. S5-2, and (d) six samples.  $R^2 > 0.8$  was used as the cut-off for statistical significance.

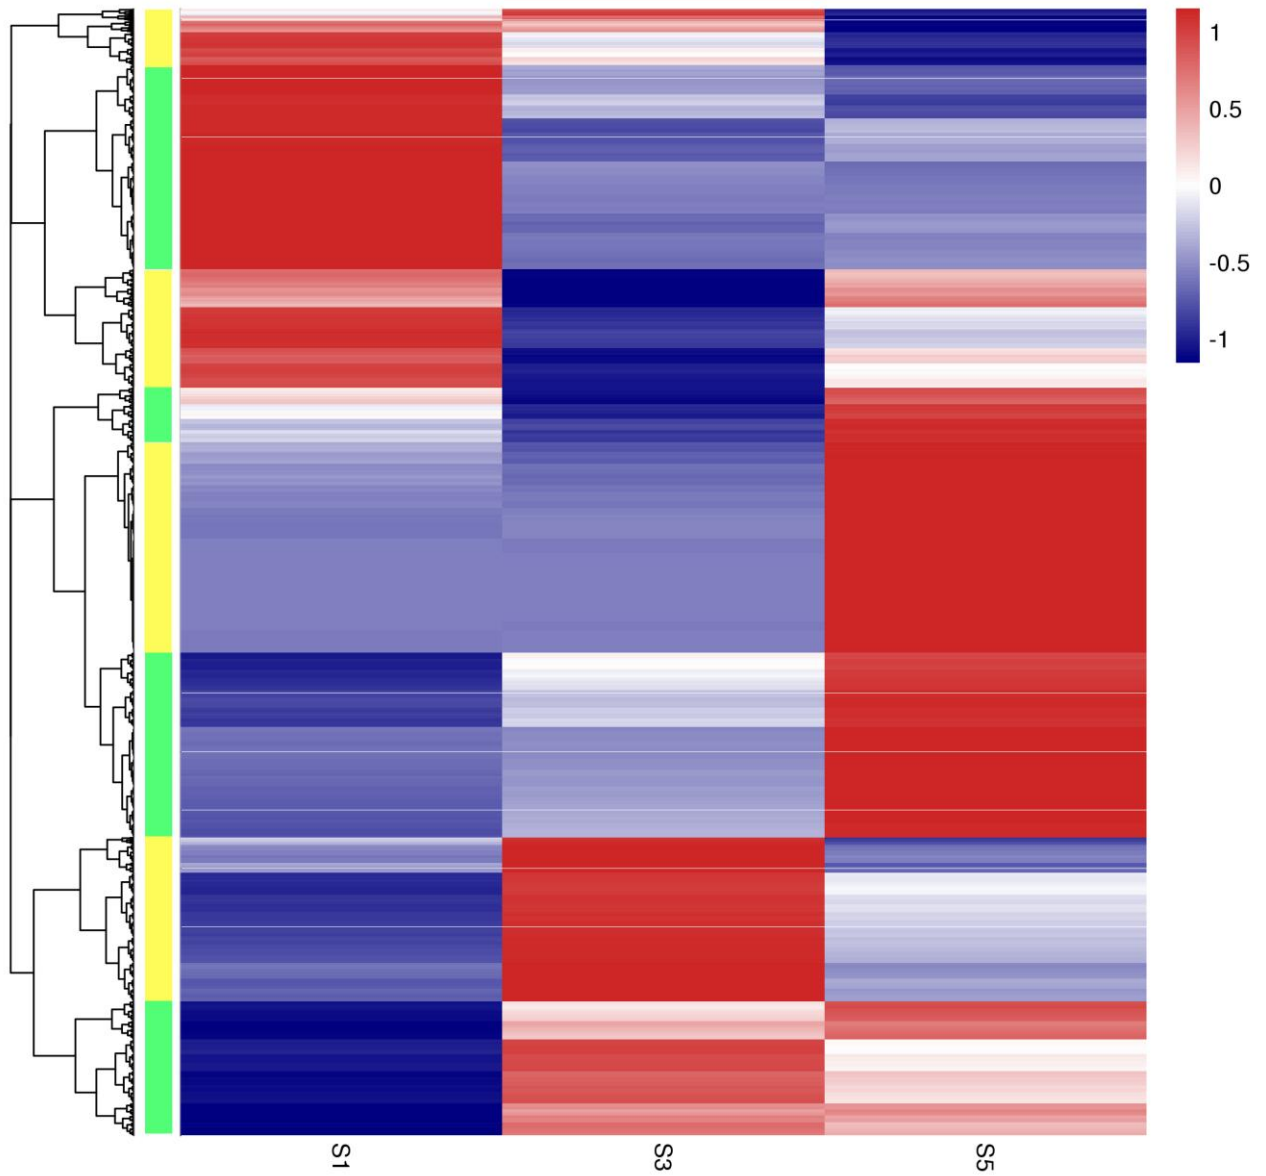

**Figure S4.** Heatmap of DEGs across three stalk-development stages in the flowering Chinese cabbage. Expression values of three stages presented as FPKM values normalized with the row Z-score. Eight main clusters are shown by the yellow and green bars, which were clustered using the Euclidean distance method associated with complete-linkage.

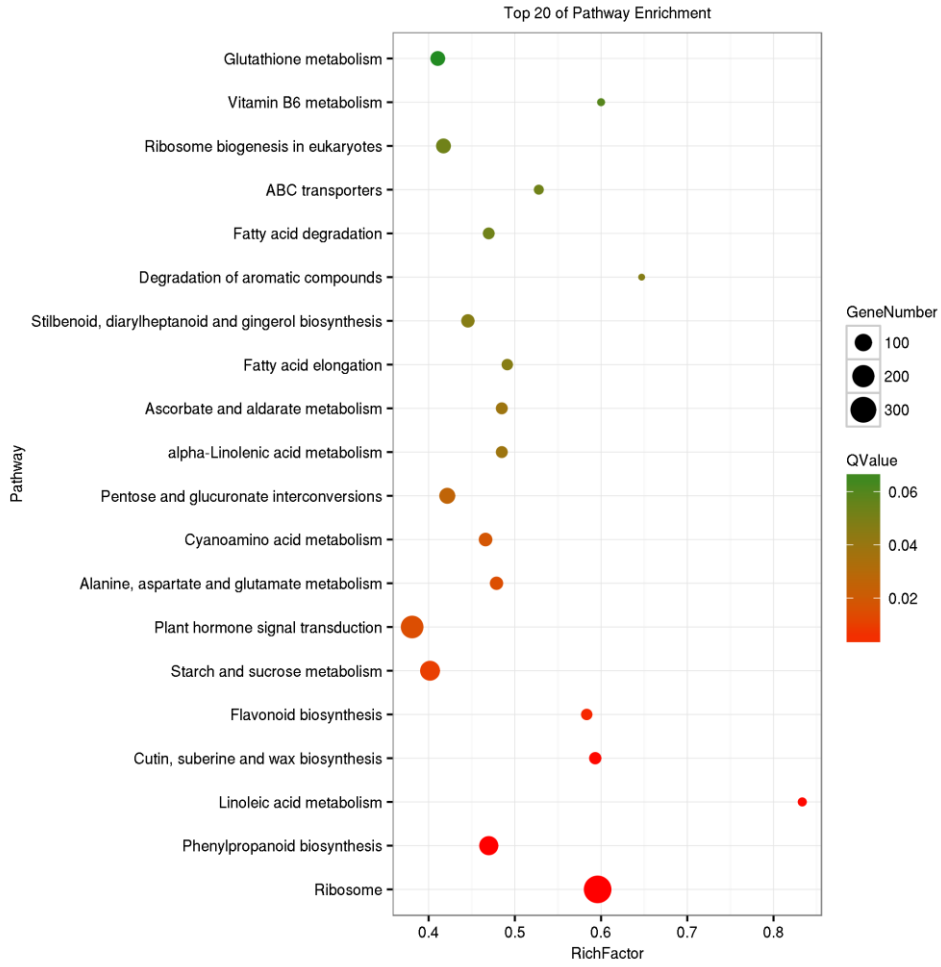

**Figure S5.** Top twenty pathway enrichments in all DEGs.

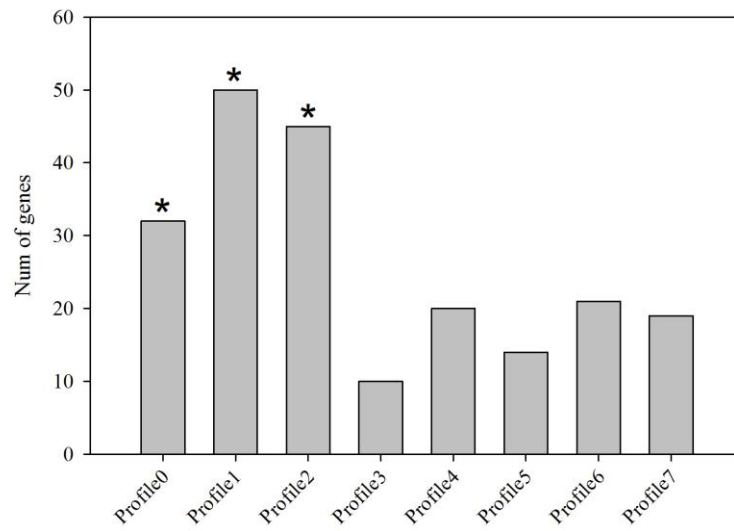

**Figure S6.** Number of genes in plant hormone signal-transduction pathways in each profile. “\*” indicates a plant hormone signal-transduction pathway that was significantly enriched in a gene-expression profile (q value < 0.05).

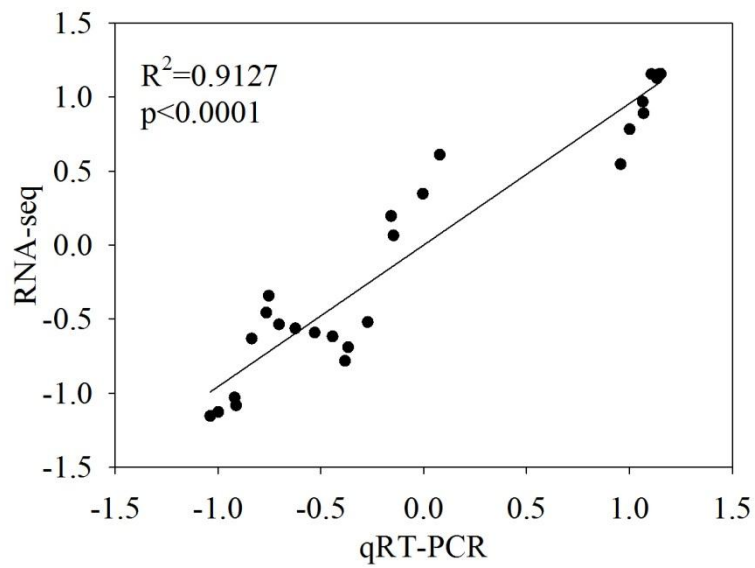

**Figure S7.** Validation of the RNA-seq gene-expression data by qRT-PCR. Nine DEGs from the RNA-seq data were used for qRT-PCR assays. Pearson's correlation coefficients between the RNA-seq and qRT-PCR data were unexceptionable, with  $R^2 > 0.8$  as the significance threshold. The row Z-scores of the FPKM and qRT-PCR data are shown.



## **Supplementary Table**

**Table S1.** List of novel transcripts that were annotated.

**Table S2.** GO terms (q value < 0.05) significantly enriched in the biological process category by DEGs in flowering Chinese cabbage.

**Table S3.** Top ten biological GO process significantly enriched in profiles 1, 4, 6, and 7.

**Table S4.** Flowering time-associated genes in flowering Chinese cabbage.

**Table S5.** Gene information and sequences of primers used for qRT-PCR.
